# Supplementary material for: SimSST: An R Statistical Software Package to Simulate Stop Signal Task Data
Source: MDPI journal article supplement (doi:10.3390/math11030500), 2023-01-17
Supplement: s1 [file s1]

## Summary statistics

|                   | Mean     | Sd      | 2.5%     | 25%      | 50%      | 75%      | 97.5%    |
|-------------------|----------|---------|----------|----------|----------|----------|----------|
| <i>mu_go</i>      | 443.2829 | 9.8995  | 424.4549 | 436.5224 | 443.1268 | 449.6387 | 463.8925 |
| <i>mu_stop</i>    | 133.226  | 41.8475 | 48.1605  | 105.5321 | 133.5868 | 161.7018 | 213.6812 |
| <i>sigma_go</i>   | 91.8387  | 6.0304  | 80.3123  | 87.704   | 91.6381  | 95.778   | 104.3216 |
| <i>sigma_stop</i> | 72.0606  | 39.4389 | 5.181    | 40.7034  | 72.012   | 100.7185 | 149.4873 |
| <i>tau_go</i>     | 91.0915  | 10.0751 | 71.0238  | 84.3644  | 91.0971  | 97.7844  | 110.9977 |
| <i>tau_stop</i>   | 88.6433  | 45.3805 | 8.1872   | 57.6743  | 86.8527  | 116.7184 | 186.6593 |
| <i>mean go</i>    | 534.3744 | 5.8067  | 513.1924 | 530.4489 | 534.2861 | 538.2089 | 559.757  |
| <i>sd go</i>      | 129.7689 | 5.4687  | 112.5112 | 125.9605 | 129.4535 | 133.2268 | 158.5787 |
| <i>mean SSRT</i>  | 221.8693 | 18.9041 | 140.8709 | 209.2684 | 221.6476 | 233.9063 | 329.5726 |
| <i>sd SSRT</i>    | 124.9308 | 32.5172 | 38.917   | 101.6205 | 120.6102 | 143.2838 | 309.3469 |
