# Supplementary material for: SimSST: An R Statistical Software Package to Simulate Stop Signal Task Data
Source: MDPI journal article supplement (doi:10.3390/math11030500), 2023-01-17
Supplement: s1 [file s1]

## Summary statistics

|                   | Mean     | Sd      | 2.5%     | 25%      | 50%      | 75%      | 97.5%    |
|-------------------|----------|---------|----------|----------|----------|----------|----------|
| <i>mu_go</i>      | 434.0269 | 7.4842  | 419.9599 | 428.8994 | 433.9491 | 438.8845 | 449.2252 |
| <i>mu_stop</i>    | 117.3669 | 39.8005 | 38.8458  | 89.4639  | 116.7211 | 146.7568 | 190.3933 |
| <i>sigma_go</i>   | 88.177   | 4.8189  | 79.0368  | 84.865   | 88.0251  | 91.2884  | 97.9982  |
| <i>sigma_stop</i> | 82.0366  | 35.3746 | 8.7623   | 57.6887  | 86.3805  | 107.8483 | 144.0776 |
| <i>tau_go</i>     | 97.0306  | 7.8977  | 81.2802  | 91.8251  | 97.0815  | 102.2839 | 112.4051 |
| <i>tau_stop</i>   | 75.7502  | 43.3402 | 4.9403   | 41.6806  | 74.6658  | 105.9246 | 165.4296 |
| <i>mean go</i>    | 531.0575 | 4.5959  | 514.6896 | 527.9327 | 531.0242 | 534.0575 | 551.6885 |
| <i>sd go</i>      | 131.3593 | 4.5228  | 116.7766 | 128.246  | 131.2109 | 134.2742 | 156.4274 |
| <i>mean SSRT</i>  | 193.1171 | 14.7785 | 133.3525 | 183.2142 | 192.9645 | 202.7555 | 270.9031 |
| <i>sd SSRT</i>    | 122.4726 | 24.4581 | 51.1132  | 105.2599 | 119.5177 | 136.681  | 257.4478 |
