# Supplementary material for: SimSST: An R Statistical Software Package to Simulate Stop Signal Task Data
Source: MDPI journal article supplement (doi:10.3390/math11030500), 2023-01-17
Supplement: s1 [file s1]

## Summary statistics

|                   | Mean     | Sd      | 2.5%     | 25%      | 50%      | 75%      | 97.5%    |
|-------------------|----------|---------|----------|----------|----------|----------|----------|
| <i>mu_go</i>      | 447.3051 | 11.1743 | 425.6425 | 439.8848 | 446.8757 | 454.5795 | 470.2317 |
| <i>mu_stop</i>    | 113.4682 | 52.5998 | 12.271   | 74.7333  | 115.6311 | 153.7738 | 206.4106 |
| <i>sigma_go</i>   | 92.7643  | 6.6596  | 80.3071  | 88.2767  | 92.5028  | 97.1597  | 106.5892 |
| <i>sigma_stop</i> | 109.2508 | 45.2436 | 14.5086  | 80.0565  | 112.1341 | 140.6402 | 192.7309 |
| <i>tau_go</i>     | 84.0378  | 11.3159 | 61.541   | 76.6423  | 83.858   | 91.4795  | 106.5195 |
| <i>tau_stop</i>   | 94.7772  | 59.9294 | 5.4297   | 46.3745  | 87.7942  | 136.0704 | 223.0302 |
| <i>mean go</i>    | 531.3429 | 6.2311  | 507.7438 | 527.1026 | 531.2808 | 535.3749 | 557.5859 |
| <i>sd go</i>      | 125.7254 | 5.7535  | 108.1636 | 121.7499 | 125.3785 | 129.3196 | 158.2162 |
| <i>mean SSRT</i>  | 208.2454 | 24.8443 | 113.4901 | 191.8102 | 207.3473 | 223.2257 | 380.5216 |
| <i>sd SSRT</i>    | 157.7086 | 41.0466 | 46.3004  | 127.9353 | 153.9152 | 183.2481 | 365.1848 |
