# Supplementary material for: SimSST: An R Statistical Software Package to Simulate Stop Signal Task Data
Source: MDPI journal article supplement (doi:10.3390/math11030500), 2023-01-17
Supplement: s1 [file s1]

## Summary statistics

|                   | Mean     | Sd      | 2.5%     | 25%      | 50%      | 75%      | 97.5%    |
|-------------------|----------|---------|----------|----------|----------|----------|----------|
| <i>mu_go</i>      | 435.2281 | 7.6443  | 420.3314 | 430.0651 | 435.0878 | 440.3021 | 450.4776 |
| <i>mu_stop</i>    | 107.8784 | 47.849  | 21.7944  | 70.1283  | 106.5696 | 146.4908 | 192.4974 |
| <i>sigma_go</i>   | 84.2265  | 4.845   | 74.8539  | 80.9499  | 84.1104  | 87.4568  | 94.093   |
| <i>sigma_stop</i> | 80.6913  | 39.7716 | 5.8762   | 50.0723  | 86.2298  | 110.6124 | 149.0153 |
| <i>tau_go</i>     | 96.7355  | 8.1321  | 80.9025  | 91.211   | 96.5868  | 102.087  | 113.1894 |
| <i>tau_stop</i>   | 89.4934  | 53.1534 | 5.3476   | 44.6626  | 87.6886  | 129.9743 | 192.8641 |
| <i>mean go</i>    | 531.9637 | 4.9975  | 511.0421 | 528.5281 | 531.8962 | 535.279  | 557.7713 |
| <i>sd go</i>      | 128.5188 | 4.9381  | 107.6602 | 125.1052 | 128.2829 | 131.6925 | 153.565  |
| <i>mean SSRT</i>  | 197.3718 | 17.4739 | 134.043  | 185.9112 | 196.7792 | 208.0043 | 296.3562 |
| <i>sd SSRT</i>    | 134.4318 | 29.2437 | 57.7392  | 113.2874 | 131.0577 | 151.7528 | 283.8165 |
