# Supplementary material for: SimSST: An R Statistical Software Package to Simulate Stop Signal Task Data
Source: MDPI journal article supplement (doi:10.3390/math11030500), 2023-01-17
Supplement: s1 [file s1]

## Summary statistics

|                   | Mean     | Sd      | 2.5%     | 25%      | 50%      | 75%      | 97.5%    |
|-------------------|----------|---------|----------|----------|----------|----------|----------|
| <i>mu_go</i>      | 440.4837 | 10.9112 | 419.5997 | 433.1137 | 440.2513 | 447.7023 | 462.9185 |
| <i>mu_stop</i>    | 135.294  | 43.789  | 35.6616  | 108.3265 | 141.1713 | 167.2939 | 206.1803 |
| <i>sigma_go</i>   | 89.0948  | 6.9916  | 76.1875  | 84.3891  | 88.8221  | 93.6099  | 103.6165 |
| <i>sigma_stop</i> | 76.0209  | 38.9597 | 7.4708   | 49.1947  | 73.9901  | 99.9464  | 160.1941 |
| <i>tau_go</i>     | 98.6527  | 11.5131 | 76.5905  | 90.9457  | 98.3726  | 106.1371 | 122.1206 |
| <i>tau_stop</i>   | 62.9326  | 44.8026 | 3.7845   | 28.9717  | 54.4228  | 87.1096  | 172.0433 |
| <i>mean go</i>    | 539.1363 | 7.4543  | 510.1875 | 533.9793 | 539.0485 | 544.1287 | 572.2255 |
| <i>sd go</i>      | 133.4193 | 7.1385  | 110.7022 | 128.4884 | 132.9644 | 137.8554 | 173.9071 |
| <i>mean SSRT</i>  | 198.2267 | 21.1851 | 106.627  | 184.549  | 198.3881 | 211.7479 | 347.5317 |
| <i>sd SSRT</i>    | 108.2302 | 39.3822 | 23.6538  | 79.7175  | 101.8706 | 130.1982 | 348.9027 |
