# Supplementary material for: SimSST: An R Statistical Software Package to Simulate Stop Signal Task Data
Source: MDPI journal article supplement (doi:10.3390/math11030500), 2023-01-17
Supplement: s1 [file s1]

## Summary statistics

|                   | Mean     | Sd      | 2.5%     | 25%      | 50%      | 75%      | 97.5%    |
|-------------------|----------|---------|----------|----------|----------|----------|----------|
| <i>mu_go</i>      | 440.2296 | 8.7516  | 423.6806 | 434.2624 | 440.0516 | 446.1574 | 457.6213 |
| <i>mu_stop</i>    | 116.2649 | 44.3889 | 30.1194  | 83.8166  | 116.626  | 150.9534 | 194.5207 |
| <i>sigma_go</i>   | 89.846   | 5.3172  | 79.7636  | 86.1794  | 89.7412  | 93.4294  | 100.6673 |
| <i>sigma_stop</i> | 80.1079  | 37.7402 | 6.9583   | 53.3432  | 83.2979  | 106.9482 | 149.3521 |
| <i>tau_go</i>     | 86.1991  | 8.9039  | 69.1337  | 80.1468  | 86.0832  | 92.1609  | 103.5725 |
| <i>tau_stop</i>   | 80.7621  | 48.8423 | 4.9824   | 41.1344  | 77.6692  | 114.9544 | 182.817  |
| <i>mean go</i>    | 526.4287 | 5.2047  | 505.8486 | 522.9477 | 526.3861 | 529.8817 | 554.1088 |
| <i>sd go</i>      | 124.8483 | 4.7993  | 108.7412 | 121.5191 | 124.6208 | 127.9192 | 151.9846 |
| <i>mean SSRT</i>  | 197.027  | 17.7771 | 120.8332 | 185.3468 | 196.471  | 208.0796 | 291.5904 |
| <i>sd SSRT</i>    | 125.8422 | 30.2214 | 41.6488  | 104.1891 | 121.9811 | 143.119  | 281.6238 |
