# Supplementary material for: SimSST: An R Statistical Software Package to Simulate Stop Signal Task Data
Source: MDPI journal article supplement (doi:10.3390/math11030500), 2023-01-17
Supplement: s1 [file s1]

## Summary statistics

|                   | Mean     | Sd      | 2.5%     | 25%      | 50%      | 75%      | 97.5%    |
|-------------------|----------|---------|----------|----------|----------|----------|----------|
| <i>mu_go</i>      | 482.4186 | 31.068  | 429.1873 | 460.1007 | 479.5947 | 502.7905 | 547.2995 |
| <i>mu_stop</i>    | 97.4126  | 60.4978 | 6.3741   | 48.6179  | 90.5462  | 139.1891 | 224.6284 |
| <i>sigma_go</i>   | 107.2077 | 15.2749 | 79.4496  | 95.914   | 106.7338 | 117.9781 | 137.401  |
| <i>sigma_stop</i> | 116.5137 | 73.6748 | 7.1327   | 59.4061  | 108.7957 | 162.3625 | 282.7734 |
| <i>tau_go</i>     | 66.567   | 30.9271 | 6.477    | 45.329   | 68.3618  | 88.214   | 124.1022 |
| <i>tau_stop</i>   | 110.2192 | 74.1999 | 6.5214   | 53.2943  | 99.7069  | 153.2909 | 284.2986 |
| <i>mean go</i>    | 548.9856 | 14.3703 | 491.9792 | 539.0691 | 548.6467 | 558.27   | 612.3778 |
| <i>sd go</i>      | 130.2165 | 12.5741 | 93.2938  | 121.415  | 128.9375 | 137.5523 | 212.4937 |
| <i>mean SSRT</i>  | 207.6318 | 57.9913 | 8.8335   | 169.8951 | 203.0547 | 238.7184 | 569.7129 |
| <i>sd SSRT</i>    | 177.6496 | 71.3982 | 23.8713  | 125.9754 | 168.2109 | 218.5609 | 582.8712 |
