# Supplementary material for: SimSST: An R Statistical Software Package to Simulate Stop Signal Task Data
Source: MDPI journal article supplement (doi:10.3390/math11030500), 2023-01-17
Supplement: s1 [file s1]

## Summary statistics

|                   | Mean     | Sd      | 2.5%     | 25%      | 50%      | 75%      | 97.5%    |
|-------------------|----------|---------|----------|----------|----------|----------|----------|
| <i>mu_go</i>      | 442.0689 | 16.5784 | 411.6779 | 430.8609 | 441.418  | 452.1909 | 476.3141 |
| <i>mu_stop</i>    | 74.7042  | 55.1024 | 3.7325   | 29.5702  | 62.9915  | 110.5913 | 197.9096 |
| <i>sigma_go</i>   | 85.0093  | 9.833   | 67.001   | 78.3341  | 84.448   | 91.0695  | 105.7426 |
| <i>sigma_stop</i> | 113.4104 | 67.2843 | 6.8923   | 59.2072  | 111.4897 | 159.8145 | 251.5364 |
| <i>tau_go</i>     | 82.3009  | 17.1408 | 48.2169  | 71.3662  | 82.2755  | 93.1637  | 116.0568 |
| <i>tau_stop</i>   | 130.4129 | 72.2193 | 8.0506   | 75.3967  | 130.6695 | 179.1409 | 278.5504 |
| <i>mean go</i>    | 524.3698 | 9.2836  | 490.3234 | 518.1484 | 524.0864 | 530.4084 | 563.387  |
| <i>sd go</i>      | 119.6231 | 8.9906  | 94.2575  | 113.3051 | 118.7935 | 125.0446 | 172.9636 |
| <i>mean SSRT</i>  | 205.1171 | 45.4034 | 50.1152  | 175.1967 | 200.8218 | 230.1294 | 483.8102 |
| <i>sd SSRT</i>    | 191.3585 | 54.7169 | 47.8328  | 153.0386 | 185.3116 | 222.7365 | 498.2573 |
