# Supplementary material for: SimSST: An R Statistical Software Package to Simulate Stop Signal Task Data
Source: MDPI journal article supplement (doi:10.3390/math11030500), 2023-01-17
Supplement: s1 [file s1]

## Summary statistics

|                   | Mean     | Sd      | 2.5%     | 25%      | 50%      | 75%      | 97.5%    |
|-------------------|----------|---------|----------|----------|----------|----------|----------|
| <i>mu_go</i>      | 443.9465 | 14.7542 | 416.2395 | 433.9141 | 443.3471 | 453.4352 | 474.9046 |
| <i>mu_stop</i>    | 166.3953 | 42.8812 | 67.9253  | 142.0552 | 168.635  | 195.7055 | 241.7488 |
| <i>sigma_go</i>   | 92.1719  | 8.8031  | 75.8602  | 86.059   | 91.8129  | 97.9744  | 110.0476 |
| <i>sigma_stop</i> | 61.0055  | 39.9368 | 3.6196   | 28.3462  | 57.0886  | 86.6825  | 149.419  |
| <i>tau_go</i>     | 83.8916  | 15.0049 | 54.3271  | 73.9664  | 83.8329  | 93.9688  | 113.2006 |
| <i>tau_stop</i>   | 70.8098  | 45.8727 | 5.1629   | 38.2491  | 65.2581  | 93.7836  | 180.5397 |
| <i>mean go</i>    | 527.8381 | 7.9904  | 498.3037 | 522.4143 | 527.7513 | 533.105  | 562.1708 |
| <i>sd go</i>      | 125.621  | 7.4465  | 103.337  | 120.3726 | 125.0131 | 130.2154 | 163.2926 |
| <i>mean SSRT</i>  | 237.2051 | 23.5665 | 141.3635 | 222.5298 | 236.5649 | 250.8906 | 438.2678 |
| <i>sd SSRT</i>    | 103.847  | 40.6285 | 17.4181  | 75.4241  | 95.5394  | 123.3011 | 431.8997 |
