# Supplementary material for: SimSST: An R Statistical Software Package to Simulate Stop Signal Task Data
Source: MDPI journal article supplement (doi:10.3390/math11030500), 2023-01-17
Supplement: s1 [file s1]

## Summary statistics

|                   | Mean     | Sd      | 2.5%     | 25%      | 50%      | 75%      | 97.5%    |
|-------------------|----------|---------|----------|----------|----------|----------|----------|
| <i>mu_go</i>      | 440.6902 | 7.6323  | 426.3411 | 435.5525 | 440.5775 | 445.7713 | 455.8248 |
| <i>mu_stop</i>    | 138.7702 | 28.6467 | 78.1517  | 119.4327 | 140.7997 | 160.3123 | 187.1535 |
| <i>sigma_go</i>   | 91.1143  | 4.6664  | 82.206   | 88.0239  | 91.0042  | 94.1543  | 100.5307 |
| <i>sigma_stop</i> | 72.5358  | 26.3811 | 13.8509  | 56.7305  | 73.8826  | 89.7608  | 122.1173 |
| <i>tau_go</i>     | 89.2829  | 7.8242  | 74.155   | 83.9868  | 89.1316  | 94.5456  | 105.1923 |
| <i>tau_stop</i>   | 44.1253  | 28.486  | 3.0328   | 20.9102  | 41.101   | 62.8926  | 107.0578 |
| <i>mean go</i>    | 529.9731 | 4.7227  | 510.719  | 526.7971 | 529.8944 | 533.1474 | 548.5127 |
| <i>sd go</i>      | 127.8158 | 4.4008  | 111.3772 | 124.7611 | 127.6109 | 130.6414 | 148.6116 |
| <i>mean SSRT</i>  | 182.8955 | 12.601  | 127.8233 | 174.6818 | 183.0791 | 191.3899 | 252.693  |
| <i>sd SSRT</i>    | 91.0545  | 20.614  | 36.0299  | 76.4361  | 88.8287  | 103.2583 | 197.0765 |
